# Supplementary material for: Poly-ε-Caprolactone Implants for Benznidazole Prolonged Release: An Alternative to Chagas Disease Oral Treatment
Source: MDPI journal article supplement (doi:10.3390/pharmaceutics15041126), 2023-04-02
Supplement: s1 [file s1]

## Supplementary Information

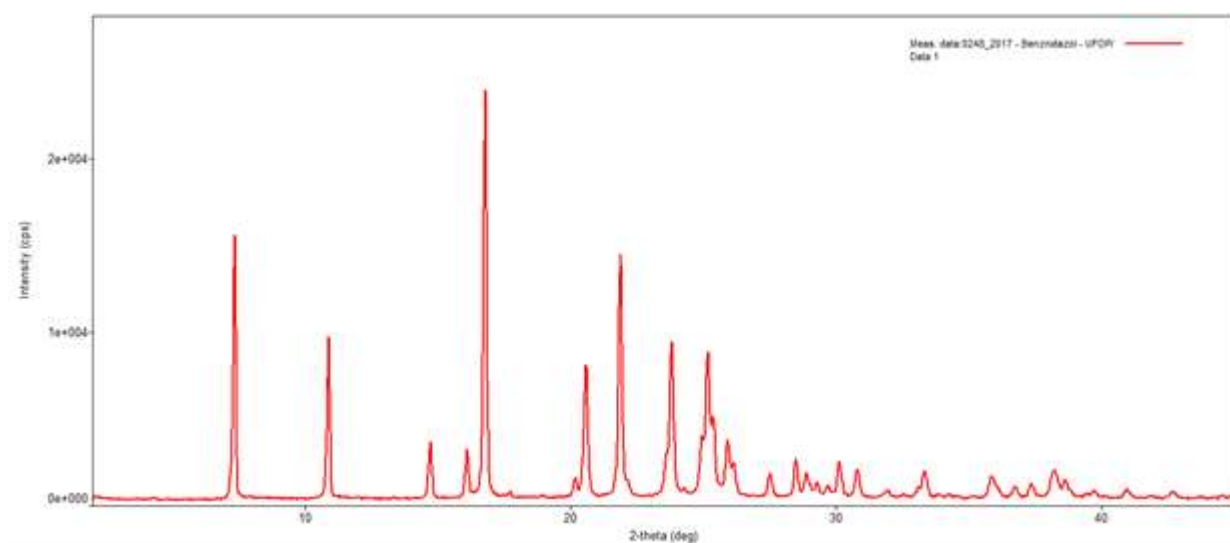

Figure I: X-ray diffraction patterns of benznidazole.

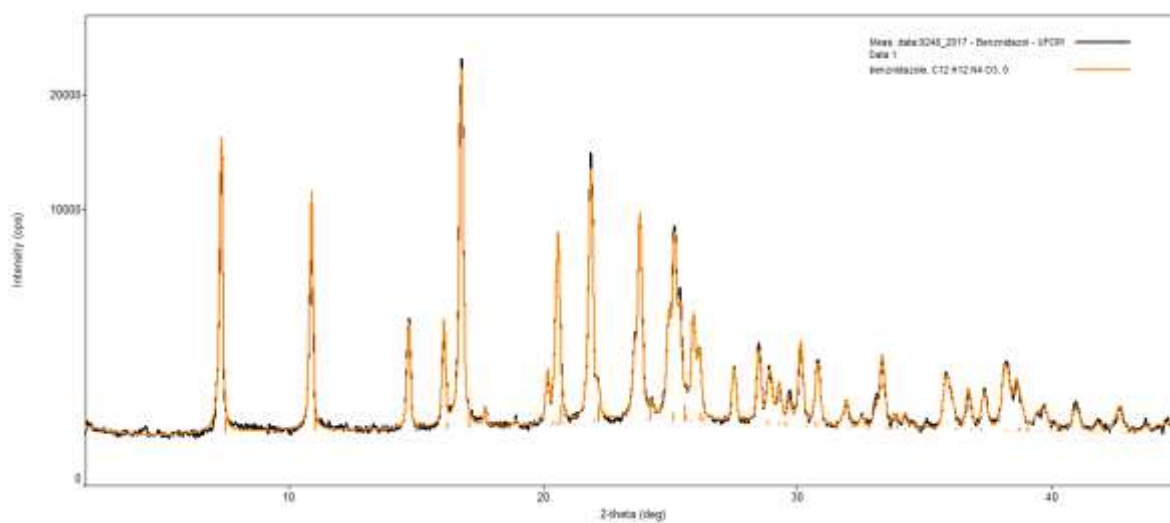

Figure II: X-ray diffraction patterns of benznidazole refined by the *Rietveld* method (black), using the crystallographic data described by Soares-Sobrinho et al. (2008) [18] (orange).

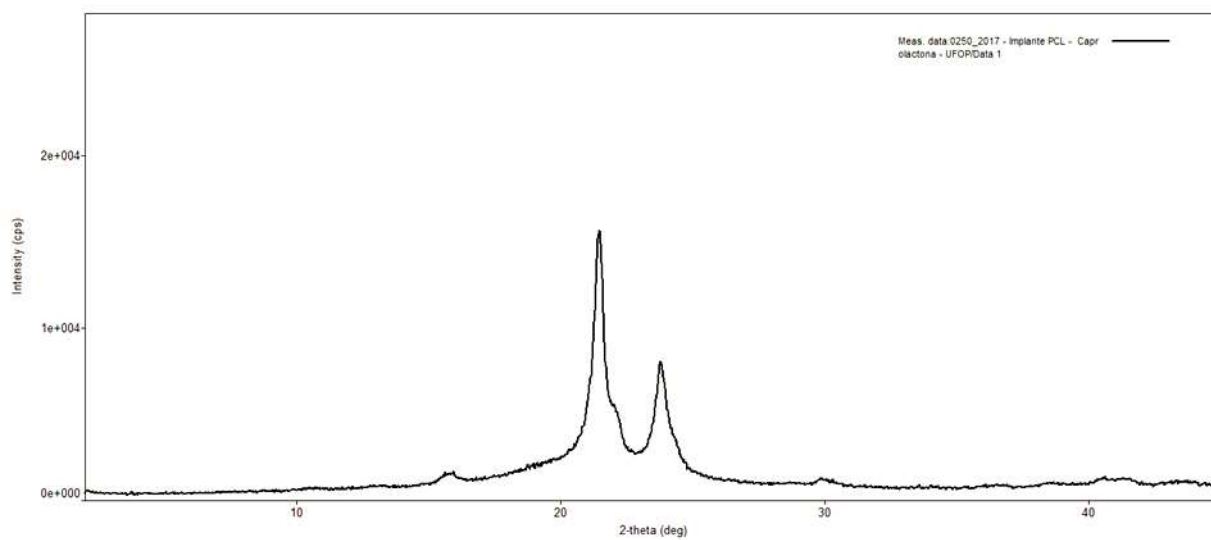

Figure III: X-ray diffraction patterns of PCL implant (without drug)
